# Supplementary material for: A 20-Year Systematic Review of the ‘Reading the Mind in the Eyes’ Test across Neurodegenerative Conditions
Source: MDPI journal article supplement (doi:10.3390/brainsci13091268), 2023-08-31
Supplement: s1 [file s1]

**Supplementary Table S1.** Overview of neurodegenerative disease characteristics.

| <b>Disease</b>                                              | <b>Neuropsychological presentation</b>   | <b>Main neuropathology</b>                                 | <b>Protein aggregate(s)</b> | <b>Main anatomical vulnerability</b>    |
|-------------------------------------------------------------|------------------------------------------|------------------------------------------------------------|-----------------------------|-----------------------------------------|
| <i><b>Alzheimer's disease</b></i>                           | Episodic memory <sup>1</sup>             | Amyloid angiopathy <sup>4</sup>                            | A $\beta$ <sup>4</sup>      | Frontal and temporal lobes <sup>4</sup> |
|                                                             | Language skills <sup>1</sup>             | Neuritic and amyloid plaques <sup>4</sup>                  | 3R + 4R tau <sup>4</sup>    | Limbic structures <sup>4</sup>          |
|                                                             | Behaviour change <sup>1</sup>            | Neuropil threads <sup>4</sup>                              |                             | Basal forebrain <sup>4</sup>            |
|                                                             | Orientational difficulties <sup>2</sup>  | Neurofibrillary tangles <sup>4</sup>                       |                             |                                         |
|                                                             | Social behaviour change <sup>2</sup>     |                                                            |                             |                                         |
|                                                             | Emotion perception <sup>3</sup>          |                                                            |                             |                                         |
|                                                             | ToM <sup>2</sup>                         |                                                            |                             |                                         |
| <i><b>Behavioural variant frontal temporal dementia</b></i> | Executive dysfunction <sup>5</sup>       | Asymmetric white and grey matter degeneration <sup>5</sup> | Tau <sup>8</sup>            | Right hemisphere <sup>5</sup>           |
|                                                             | Personality change <sup>6</sup>          |                                                            | Straight filaments          | Ventral frontal regions <sup>5</sup>    |
|                                                             | Social comportment disorder <sup>5</sup> | Neuronal cytoplasmic inclusions <sup>4</sup>               | PHF <sup>8</sup>            | Fronto-polar cortex <sup>9</sup>        |
|                                                             | Reduced social competencies <sup>6</sup> |                                                            | TDP-43 <sup>4</sup>         |                                         |
|                                                             | ToM <sup>7</sup>                         |                                                            |                             |                                         |

|                                             |                                                                        |                                                       |                                                  |                                                      |
|---------------------------------------------|------------------------------------------------------------------------|-------------------------------------------------------|--------------------------------------------------|------------------------------------------------------|
| <b><i>Dementia with<br/>lewy bodies</i></b> | Attention difficulties <sup>10</sup>                                   | Lewy bodies <sup>4</sup>                              | $\alpha$ -synuclein <sup>11</sup>                | Cerebral cortex <sup>4</sup>                         |
|                                             | Executive dysfunction <sup>10</sup>                                    | Lew neurites <sup>4</sup>                             |                                                  | Amygdala <sup>4</sup>                                |
|                                             | Episodic verbal memory <sup>10</sup>                                   |                                                       |                                                  | Hippocampus <sup>4</sup>                             |
|                                             | Apathy                                                                 |                                                       |                                                  | Substantia nigra <sup>4</sup>                        |
|                                             | ToM                                                                    |                                                       |                                                  |                                                      |
| <b><i>Huntington's<br/>disease</i></b>      | Motor decline <sup>12</sup>                                            | CAG expansion in the<br>huntingtin gene <sup>12</sup> | Huntingdon<br>nuclear<br>inclusions <sup>8</sup> | Caudate and putamen gray matter change <sup>15</sup> |
|                                             | Executive function <sup>13</sup>                                       |                                                       |                                                  | Striatum <sup>15</sup>                               |
|                                             | Working memory <sup>14</sup>                                           |                                                       |                                                  | Corpus callosum <sup>15</sup>                        |
|                                             | Processing speed <sup>14</sup>                                         |                                                       |                                                  |                                                      |
|                                             | Emotion recognition <sup>14</sup>                                      |                                                       |                                                  |                                                      |
| <b><i>Mild cognitive<br/>impairment</i></b> | Isolated cognitive deficit in<br>the absence of dementia <sup>16</sup> | Precursor to AD<br>development <sup>16</sup>          | Tau <sup>17</sup>                                | Prefrontal lobe <sup>16</sup>                        |
|                                             | Isolated deficit of memory =<br>aMCI <sup>16</sup>                     |                                                       |                                                  | Medial temporal lobe <sup>16</sup>                   |
|                                             | Executive dysfunction <sup>16</sup>                                    |                                                       |                                                  | Hippocampus <sup>17</sup>                            |
|                                             | ToM <sup>16</sup>                                                      |                                                       |                                                  | Amygdala <sup>17</sup>                               |
|                                             |                                                                        |                                                       |                                                  |                                                      |
| <b><i>Motor neuron<br/>disease –</i></b>    | Executive dysfunction <sup>13</sup>                                    | Upper and lower motor<br>neuron loss <sup>4</sup>     | TDP-43 <sup>4</sup>                              | Motor cortex <sup>4</sup>                            |
|                                             | Behaviour change <sup>13</sup>                                         |                                                       |                                                  | Spinal cord and brainstem motor neurons <sup>4</sup> |

|                                                                     |                                                                        |                                                                                                    |                                    |                                    |
|---------------------------------------------------------------------|------------------------------------------------------------------------|----------------------------------------------------------------------------------------------------|------------------------------------|------------------------------------|
| <b><i>Amyotrophic lateral sclerosis</i></b>                         | Apathy <sup>13</sup>                                                   | Neuronal inclusions <sup>4</sup>                                                                   |                                    | Orbitofrontal cortex <sup>13</sup> |
|                                                                     |                                                                        | Astrocytic hyaline inclusion <sup>4</sup>                                                          |                                    | Prefrontal cortex <sup>13</sup>    |
|                                                                     |                                                                        |                                                                                                    |                                    | Anterior cingulate <sup>13</sup>   |
| <b><i>Motor neuron disease – Spinal bulbar muscular atrophy</i></b> | Weakening of bulbar, facial, and limb muscles <sup>18</sup>            | Trinucleotide (CAG) repeat expansion in the first exon of the androgen receptor gene <sup>21</sup> | AR <sup>18</sup>                   | Primary motor cortex <sup>18</sup> |
|                                                                     | Attention difficulties <sup>19</sup>                                   |                                                                                                    |                                    | Frontal lobe <sup>18</sup>         |
|                                                                     | Executive dysfunction <sup>19</sup>                                    |                                                                                                    |                                    | Cerebellum <sup>18</sup>           |
|                                                                     | Verbal memory <sup>20</sup>                                            |                                                                                                    |                                    | Brainstem <sup>18</sup>            |
|                                                                     | Communication <sup>18</sup>                                            |                                                                                                    |                                    |                                    |
| <b><i>Multiple Sclerosis</i></b>                                    | Motor decline <sup>22</sup>                                            | Demyelination <sup>26</sup>                                                                        | Myelin basic protein <sup>28</sup> | CNS <sup>26</sup>                  |
|                                                                     | Executive dysfunction <sup>23</sup>                                    | Axonal damage and loss <sup>26</sup>                                                               |                                    |                                    |
|                                                                     | ToM <sup>24</sup>                                                      | Reactive gliosis <sup>26</sup>                                                                     |                                    |                                    |
|                                                                     | Emotion perception <sup>25</sup>                                       | Inflammation <sup>27</sup>                                                                         |                                    |                                    |
| <b><i>Parkinson's Disease</i></b>                                   | Motor disturbance <sup>29</sup> (i.e., rigidity, postural instability) | Neuronal degeneration <sup>30</sup>                                                                | $\alpha$ -synuclein <sup>8</sup>   | Substantia nigra <sup>30</sup>     |
|                                                                     | Verbal learning memory <sup>29</sup>                                   | Dopaminergic denervation <sup>30</sup>                                                             |                                    | Basal ganglia <sup>29</sup>        |
|                                                                     |                                                                        |                                                                                                    |                                    | Limbic system <sup>29</sup>        |

Visuospatial processing<sup>29</sup>

Emotional dysfunction<sup>29</sup>

*Note.* ToM = Theory of mind; CNS = Central nervous system; <sup>1</sup>Agrawal & Biswas, 2015, <sup>2</sup>Kessels *et al.* 2021, <sup>3</sup>Torres Mendonça De Melo Fádel *et al.* 2019, <sup>4</sup>Dugger & Dickson, 2017, <sup>5</sup>Irwin *et al.* 2018, <sup>6</sup>Rascovsky *et al.* 2011, <sup>7</sup>Adenzato *et al.* 2010, <sup>8</sup>Relja, 2004, <sup>9</sup>Torralva *et al.* 2009, <sup>10</sup>Hansen *et al.* 2021, <sup>11</sup>Schumacker *et al.* 2021, <sup>12</sup>Scahill *et al.* 2020, <sup>13</sup>Burke *et al.* 2017, <sup>14</sup>Labuschagne *et al.* 2016, <sup>15</sup>McColgan *et al.* 2018, <sup>16</sup>Poletti & Bonuccelli, 2013, <sup>17</sup>Moreau *et al.* 2015, <sup>18</sup>Di Rosa *et al.* 2015, <sup>19</sup>Soukup *et al.* 2009, <sup>20</sup>Guidetti *et al.* 1996, <sup>21</sup>Spada *et al.* 1991, <sup>22</sup>Lin *et al.* 2020, <sup>23</sup>Giazkoulidou *et al.* 2019, <sup>24</sup>Mike *et al.* 2013, <sup>25</sup>Radlak *et al.* 2021, <sup>26</sup>Reynolds *et al.* 2011, <sup>27</sup>Sobel & Moore, 2008, <sup>28</sup>Krugmann *et al.* 2020, <sup>29</sup> Parkash *et al.* 2016, <sup>30</sup> Dickson, 2018
